# Supplementary material for: Failure to Replicate Depletion of Self-Control
Source: PLoS One. 2014 Oct 21;9(10):e109950. doi: 10.1371/journal.pone.0109950 (PMC4204816; doi:10.1371/journal.pone.0109950)
Supplement: Data S2 — De-identified data for Stroop studies. (XLSX) [file pone.0109950.s002.xlsx]

## Sheet: Sheet1
SubjectID	Age_group	Age	Gender	BMI	Condition	Pre_RT	Post_RT	Pre_Accuracy	Post_Accuracy	Hispanic	Race_Category
101	Community Adults	44	F	41.6	Depletion	790.54	709.54	1	0.988095	Not Hispanic/Latino	Caucasian
102	Community Adults	66	F	27.8	Depletion	986.46	906.79	1	1	Not Hispanic/Latino	Caucasian
103	Community Adults	53	F	28.34	Control	938.91	741.55	0.958333	0.988095	Not Hispanic/Latino	Caucasian
104	Community Adults	65	F	31.32	Depletion	1320.08	1096.62	1	0.988095	Hispanic/Latino	Other/Multiple
105	Community Adults	64	F	33.89	Depletion	1003.88	859.46	0.958333	0.97619	NA	Caucasian
106	Community Adults	54	F	28.32	Control	947.21	897.49	1	1	Not Hispanic/Latino	Caucasian
107	Community Adults	23	F	26.26	Control	778.09	693.06	0.958333	0.988095	Not Hispanic/Latino	Caucasian
108	Community Adults	51	F	29.52	Depletion	878.25	742.71	1	1	Not Hispanic/Latino	Caucasian
109	Community Adults	54	F	18.89	Depletion	1327.13	950.02	1	1	Not Hispanic/Latino	African American
110	Community Adults	51	M	31.19	Control	2075	1292.38	0.0833333	0.630952	Not Hispanic/Latino	Caucasian
111	Community Adults	56	F	24.8	Control	1470.7	1139.1	0.958333	1	Not Hispanic/Latino	Caucasian
112	Community Adults	39	F	25.06	Depletion	685.29	632.6	1	1	Not Hispanic/Latino	Caucasian
113	Community Adults	30	M	33.45	Depletion	556.38	572.04	1	0.97619	Not Hispanic/Latino	Caucasian
114	Community Adults	24	M	29.43	Depletion	844.21	735.74	1	0.97619	Hispanic/Latino	NA
115	Community Adults	46	F	25.82	Control	1166	1068.85	0.875	1	Not Hispanic/Latino	Caucasian
116	Community Adults	43	F	39.32	Control	956.35	795.5	0.958333	0.97619	Not Hispanic/Latino	Other/Multiple
117	Community Adults	28	F	32.59	Depletion	658.04	675.93	0.916667	0.97619	Not Hispanic/Latino	Caucasian
118	Community Adults	26	F	24.03	Control	620.42	603.18	1	0.940476	Not Hispanic/Latino	Caucasian
119	Community Adults	36	F	28.9	Depletion	738.54	686.96	1	1	Not Hispanic/Latino	Caucasian
120	Community Adults	21	F	18.56	Depletion	679.88	622.69	1	1	Hispanic/Latino	Caucasian
122	Community Adults	22	M	28.19	Depletion	881.46	739.9	1	1	Not Hispanic/Latino	African American
123	Community Adults	53	F	27.43	Depletion	859.42	847.33	1	0.988095	Not Hispanic/Latino	Caucasian
124	Community Adults	41	M	34.58	Control	809.96	969.73	1	0.97619	Hispanic/Latino	African American
125	Community Adults	54	F	20.12	Control	802.5	822.44	1	1	Not Hispanic/Latino	African American
126	Community Adults	42	F	27.46	Depletion	1166.96	991.94	1	1	NA	Asian
127	Community Adults	58	M	36.49	Control	1403.45	817.27	0.916667	1	Hispanic/Latino	Other/Multiple
128	Community Adults	51	M	31.01	Control	1009.17	876.89	1	1	Not Hispanic/Latino	African American
129	Community Adults	45	F	25.85	Control	936.25	814.46	1	1	Not Hispanic/Latino	Caucasian
130	Community Adults	24	M	26.12	Control	505.29	523.38	0.875	0.940476	Not Hispanic/Latino	Caucasian
131	Community Adults	48	F	31.55	Depletion	1212.38	861.67	1	1	Not Hispanic/Latino	African American
132	Community Adults	35	F	19.93	Control	1044.13	917.02	1	1	Not Hispanic/Latino	African American
133	Community Adults	32	F	25.05	Control	751.38	704.9	1	0.940476	Not Hispanic/Latino	Caucasian
134	Community Adults	47	M	28.94	Depletion	1377.79	1122.62	0.833333	0.821429	Not Hispanic/Latino	Caucasian
135	Community Adults	51	F	30.34	Control	1393.6	1760.57	0.440274	0.27381	Hispanic/Latino	African American
136	Community Adults	53	F	28.69	Control	1167.54	909.28	1	0.97619	Not Hispanic/Latino	Caucasian
137	Community Adults	50	F	23.8	Control	1144.64	957.24	0.916667	0.952381	Not Hispanic/Latino	African American
138	Community Adults	50	M	32.77	Control	1504.87	856.62	0.958333	0.97619	Not Hispanic/Latino	Caucasian
139	Community Adults	27	M	29.21	Control	829.25	705.57	1	0.988095	Not Hispanic/Latino	Caucasian
600	Young Adults	23	F	24.21	Depletion	885.13	693.14	0.958333	0.988095	Hispanic/Latino	Caucasian
601	Young Adults	24	F	22.11	Depletion	717.92	676.37	1	0.97619	Not Hispanic/Latino	Caucasian
602	Young Adults	23	F	19.63	Depletion	839.54	652.86	1	1	Not Hispanic/Latino	Caucasian
603	Young Adults	24	F	20.97	Control	725.83	627.95	0.958333	0.940476	Hispanic/Latino	Caucasian
604	Young Adults	22	F	22.31	Depletion	858.22	737.3	0.958333	0.964286	Not Hispanic/Latino	Caucasian
605	Young Adults	25	F	19.48	Control	577.83	661.19	1	0.964286	Not Hispanic/Latino	Caucasian
606	Young Adults	24	F	21.03	Control	683.38	583.49	1	0.952381	Not Hispanic/Latino	Caucasian
607	Young Adults	27	M	22.04	Depletion	733.58	724.27	1	0.97619	Not Hispanic/Latino	Caucasian
608	Young Adults	26	F	23.59	Control	643.71	607.39	1	0.988095	Not Hispanic/Latino	Caucasian
609	Young Adults	27	M	29.53	Control	680.71	624.64	1	0.964286	Not Hispanic/Latino	Caucasian
610	Young Adults	26	F	23.03	Depletion	621.65	588.96	0.958333	0.988095	Not Hispanic/Latino	Caucasian
611	Young Adults	18	F	23.03	Depletion	817.27	980.14	0.916667	0.928571	Not Hispanic/Latino	Asian
612	Young Adults	20	F	22.13	Control	821.83	859.1	0.958333	0.97619	Not Hispanic/Latino	Asian
613	Young Adults	18	F	24.21	Control	691.54	604.6	1	0.97619	Hispanic/Latino	NA
614	Young Adults	20	F	17.23	Depletion	670.5	590.92	1	1	Not Hispanic/Latino	Asian
615	Young Adults	18	F	23.17	Depletion	609.63	641.5	1	1	Not Hispanic/Latino	African American
616	Young Adults	20	F	21.45	Control	840.79	781.81	1	1	Not Hispanic/Latino	Asian
617	Young Adults	19	F	26.52	Depletion	690.08	525.75	1	0.988095	Not Hispanic/Latino	Asian
618	Young Adults	20	M	18.24	Control	716.58	617.7	0.5	0.940476	Not Hispanic/Latino	Caucasian
619	Young Adults	19	F	21.28	Control	757.54	664.2	1	0.964286	Not Hispanic/Latino	Other/Multiple
620	Young Adults	20	M	25.06	Control	670.38	584.79	1	0.916667	Not Hispanic/Latino	Asian
621	Young Adults	19	F	22.49	Control	995.52	684.69	0.958333	0.964286	Hispanic/Latino	NA
622	Young Adults	18	F	20.17	Control	675.83	597.41	1	0.964286	Not Hispanic/Latino	Asian
623	Young Adults	18	M	22.96	Depletion	711.9	613.28	0.833333	0.928571	Not Hispanic/Latino	Other/Multiple
624	Young Adults	18	F	25.51	Control	756.86	703.7	0.875	0.904762	Not Hispanic/Latino	Other/Multiple
625	Young Adults	20	F	27.45	Depletion	921.38	684.67	1	0.940476	Not Hispanic/Latino	Caucasian
626	Young Adults	19	M	18.65	Depletion	564.3	577.89	0.958333	0.940476	Hispanic/Latino	Caucasian
627	Young Adults	21	M	19.2	Depletion	648.46	496.5	1	0.97619	Hispanic/Latino	Other/Multiple
628	Young Adults	23	F	21.11	Control	791.5	902.34	1	0.940476	Not Hispanic/Latino	Asian
629	Young Adults	21	M	21.45	Depletion	877.14	823.97	0.916667	0.940476	Not Hispanic/Latino	Caucasian
630	Young Adults	22	M	21.41	Control	669.7	503.19	0.958333	0.964286	Not Hispanic/Latino	Asian
631	Young Adults	19	F	23.91	Depletion	732.52	838.89	0.958333	0.964286	Not Hispanic/Latino	Asian
632	Young Adults	20	M	23.18	Depletion	910.43	741.7	0.875	0.952381	Not Hispanic/Latino	Caucasian
633	Young Adults	18	F	20.72	Control	509.59	468.73	0.916667	0.97619	Not Hispanic/Latino	Other/Multiple
634	Young Adults	19	F	18.94	Depletion	699.21	671.86	1	0.964286	Not Hispanic/Latino	Caucasian
635	Young Adults	19	M	18.99	Depletion	829.63	658.53	1	0.988095	Not Hispanic/Latino	Caucasian
636	Young Adults	21	M	24.33	Depletion	876.26	667.46	0.958333	1	Not Hispanic/Latino	Caucasian
637	Young Adults	19	F	18.88	Depletion	784.46	699.37	1	0.988095	Not Hispanic/Latino	Asian
639	Young Adults	19	M	23.29	Control	759.38	701.42	1	1	Not Hispanic/Latino	Asian
640	Young Adults	20	F	23.77	Depletion	795.75	665.3	1	1	Not Hispanic/Latino	Asian
641	Young Adults	18	F	23.17	Depletion	748.87	666.05	0.958333	0.988095	Not Hispanic/Latino	Caucasian
642	Young Adults	21	F	25.42	Control	849.96	754.84	1	0.988095	Hispanic/Latino	Other/Multiple
643	Young Adults	25	F	23.56	Control	712.58	742.18	1	1	Not Hispanic/Latino	Caucasian
647	Young Adults	24	F	28.19	Depletion	739.54	685.35	1	0.988095	Not Hispanic/Latino	Caucasian
649	Young Adults	25	M	27.26	Control	779.75	705.26	1	1	Not Hispanic/Latino	Caucasian
650	Young Adults	25	F	24.54	Control	798.38	735.88	1	1	Not Hispanic/Latino	Caucasian
